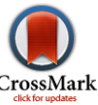

## Correction

# Correction: Towards the Disease Biomarker in an Individual Patient Using Statistical Health Monitoring

The *PLOS ONE* Staff

## Notice of Republication

This article was republished on April 16, 2014, to correct errors in the numbering of equations that were introduced during the production process. The publisher apologizes for the errors. Please download this article again to view the correct version.

## Reference

1. Engel J, Blanchet L, Engelke UFH, Wevers RA, Buydens LMC (2014) Towards the Disease Biomarker in an Individual Patient Using Statistical Health Monitoring. *PLoS ONE* 9(4): e92452. doi:10.1371/journal.pone.0092452

---

**Citation:** The *PLOS ONE* Staff (2014) Correction: Towards the Disease Biomarker in an Individual Patient Using Statistical Health Monitoring. *PLoS ONE* 9(5): e97371. doi:10.1371/journal.pone.0097371

**Published:** May 5, 2014

**Copyright:** © 2014 The *PLOS ONE* Staff. This is an open-access article distributed under the terms of the Creative Commons Attribution License, which permits unrestricted use, distribution, and reproduction in any medium, provided the original author and source are credited.
